# Supplementary material for: Glucospanlastics: innovative antioxidant and anticancer ascorbyl-2-glucoside vesicles for striking topical performance of repurposed itraconazole
Source: Royal Society of Chemistry journal article supplement (doi:10.1039/d4ra03542a), 2024-01-01
Supplement: d4ra03542a1.pdf [file d4ra03542a1.pdf]

## Supplementary Information

### **Glucospanlastics: Innovative antioxidant and anticancer ascorbyl-2-glucoside vesicles for striking topical performance of repurposed itraconazole**

**Caroline Lamie<sup>1,3</sup>, Enas Elmowafy <sup>2</sup>, \*Dalia A. Attia<sup>1</sup>, and Nahed D. Mortada<sup>2</sup>**

*<sup>1</sup>Department of Pharmaceutics and Pharmaceutical Technology, The British University in Egypt, Cairo, Egypt, 11837.*

*<sup>2</sup>Department of Pharmaceutics and Industrial Pharmacy, Faculty of Pharmacy, AinShams University, Cairo, Egypt, Monazzamet Elwehda Elafrikeya Street, Abbaseyya, Cairo, Egypt, 11566.*

*<sup>3</sup>Drug Discovery, Delivery and Patient Care (DDDPC), School of Life Sciences, Pharmacy and Chemistry, Kingston University London, Kingston Upon Thames, Surrey, KT1 2EE, UK.*

#### **Corresponding author**

**Dalia A. Attia**

Department of Pharmaceutics and Pharmaceutical Technology, The British University in Egypt, Cairo, Egypt

Tel.:(+202)01111414144

Fax:(+202)26300010/20

Email: [dalia.rhman@bue.edu.eg](mailto:dalia.rhman@bue.edu.eg)



**Table S1: Stability study results after one, three months stored at 4°C for the prepared medicated conventional spanlastics and glucospanlastics as component.**

| For-<br>mula<br>code   | PS (nm)   |                  |                  | PDI       |                  |                  | ZP (mV)    |                  |                  |
|------------------------|-----------|------------------|------------------|-----------|------------------|------------------|------------|------------------|------------------|
|                        | Fresh     | After<br>1 month | After<br>3 month | Fresh     | After<br>1 month | After<br>3 month | Fresh      | After<br>1 month | After<br>3 month |
| <b>P<sub>SP2</sub></b> | 223.8±0.9 | 225.6±0.2        | 230.7±0.4        | 0.50±0.05 | 0.45±0.14        | 0.42±0.02        | -38.7±0.10 | -37.5±2.42       | -35.1±0.07       |
| <b>P<sub>SP3</sub></b> | 338.4±1.6 | 340.1±1.7        | 345.2±3.5        | 0.46±0.07 | 0.46±0.11        | 0.44±0.48        | -39.2±1.41 | -39.2±0.71       | -34.2±0.91       |
| <b>P<sub>CG2</sub></b> | 286.0±4.3 | 290.2±0.9        | 295.4±0.7        | 0.41±0.06 | 0.38±0.02        | 0.40±0.17        | -35.6±0.62 | -35.2±0.52       | -32.7±0.32       |
| <b>P<sub>CG3</sub></b> | 414.0±9.4 | 420.1±4.2        | 425.3±4.1        | 0.49±0.07 | 0.51±0.41        | 0.46±0.03        | -38.2±0.21 | -38.1±1.31       | -32.2±0.42       |
| <b>P<sub>CG5</sub></b> | 404.5±3.1 | 410.9±7.7        | 415.2±2.3        | 0.45±0.08 | 0.41±0.01        | 0.45±0.02        | -31.9±0.35 | -30.9±2.12       | -27.3±0.67       |
| <b>P<sub>CG6</sub></b> | 430.3±6.4 | 435.2±3.7        | 438.3±1.5        | 0.44±0.04 | 0.49±0.05        | 0.50±0.01        | -33.6±0.49 | -33.6±0.78       | -31.2±0.35       |
| <b>P<sub>CG8</sub></b> | 425.0±2.3 | 435.1±3.1        | 440.5±3.4        | 0.43±0.02 | 0.42±0.04        | 0.42±0.32        | -30.8±0.32 | -31.2±0.22       | -22.5±0.48       |
| <b>P<sub>CG9</sub></b> | 454.4±7.2 | 460.7±1.9        | 466.3±2.8        | 0.48±0.03 | 0.53±0.35        | 0.53±0.24        | -32.8±1.55 | -36.4±0.04       | -30.1±0.05       |

  

| For-<br>mula<br>code   | EE (%)    |                  |                  | DL (%)    |                  |                  |
|------------------------|-----------|------------------|------------------|-----------|------------------|------------------|
|                        | Fresh     | After<br>1 month | After<br>3 month | Fresh     | After<br>1 month | After<br>3 month |
| <b>P<sub>SP2</sub></b> | 88.2±0.10 | 87.5±0.45        | 85.5±0.12        | 4.91±0.21 | 4.02±0.10        | 4.10±0.21        |
| <b>P<sub>SP3</sub></b> | 60.2±1.30 | 59.4±0.14        | 59.4±0.24        | 4.83±0.34 | 4.42±0.21        | 4.42±0.31        |
| <b>P<sub>CG2</sub></b> | 99.4±1.02 | 98.2±2.11        | 97.2±0.32        | 4.23±0.02 | 4.23±0.04        | 4.01±0.02        |
| <b>P<sub>CG3</sub></b> | 97.8±0.81 | 97.81±1.2        | 97.5±1.02        | 8.49±0.81 | 8.31±0.42        | 8.21±0.21        |
| <b>P<sub>CG5</sub></b> | 98.8±0.64 | 98.4±0.32        | 97.8±0.54        | 4.20±0.26 | 4.11 ±0.31       | 3.91±0.11        |
| <b>P<sub>CG6</sub></b> | 96.4±0.52 | 96.3±0.42        | 95.3±0.21        | 8.20±0.04 | 8.12±0.17        | 8.11±0.31        |
| <b>P<sub>CG8</sub></b> | 97.2±0.32 | 96.2±0.21        | 96.4±0.41        | 4.32±0.07 | 3.92 ±0.52       | 4.01±0.02        |
| <b>P<sub>CG9</sub></b> | 95.9±0.41 | 95.4±0.94        | 95.2±0.74        | 8.41±0.14 | 8.02±0.01        | 8.23±0.12        |

**PS: particle size, PDI: polydispersity index, ZP: zeta-potential, EE: entrapment efficiency, DL: drug loading.**

**-Psp2: conventional spanlastics containing 10 mg ITZ.**

**-Psp3: conventional spanlastics containing 20 mg ITZ.**

**-PCG2: ITZ-glucospanlastics containing 10 mg AA-2G and 10 mg ITZ.**

**-PCG6: ITZ-glucospanlastics containing 20 mg AA-2G and 20 mg ITZ.**

**-PCG3: ITZ-glucospanlastics containing 10 mg AA-2G and 20 mg ITZ.**

**-PCG8: ITZ-glucospanlastics containing 30 mg AA-2G and 10 mg ITZ.**

**-PCG5: ITZ-glucospanlastics containing 20 mg AA-2G and 10 mg ITZ.**

**-PCG9: ITZ-glucospanlastics containing 30 mg AA-2G and 20 mg ITZ.**

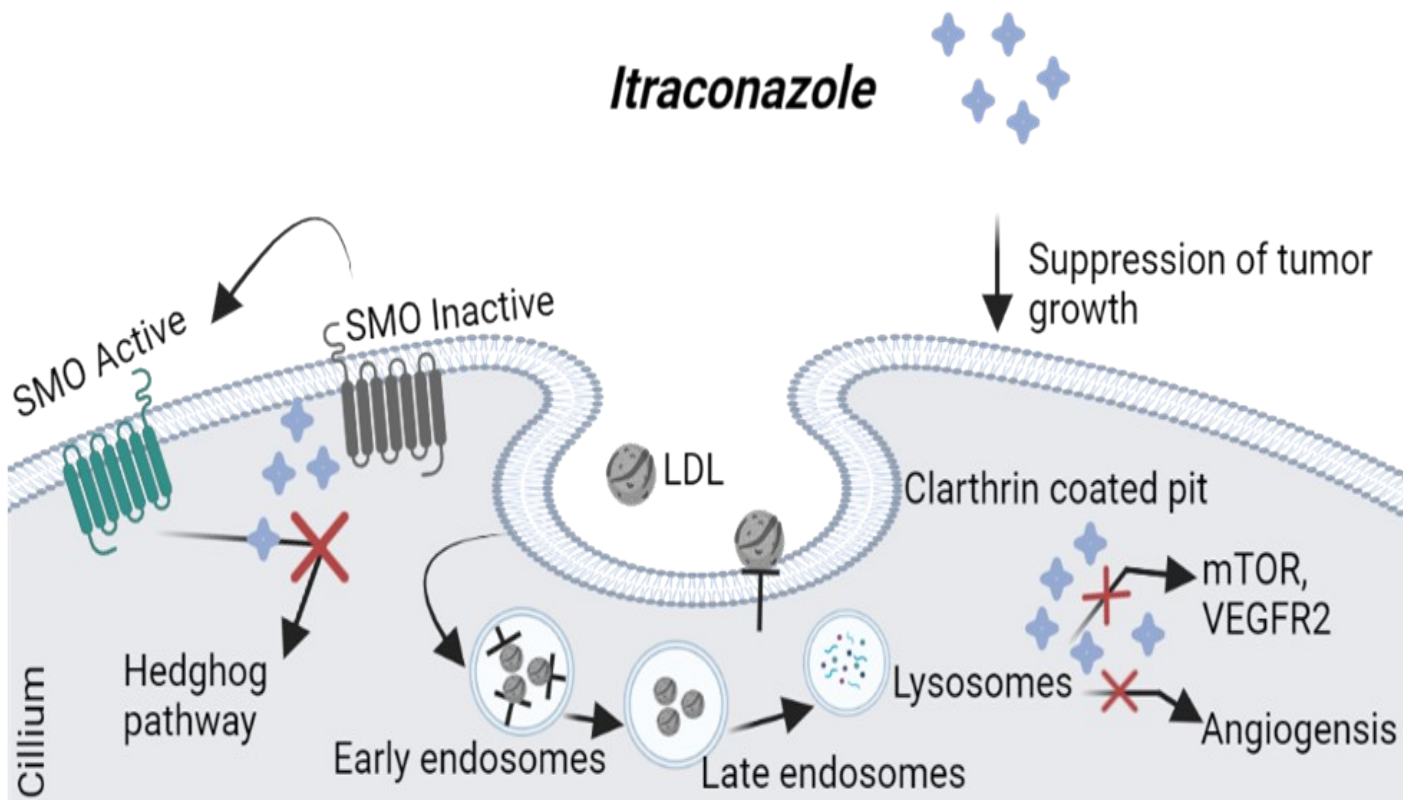

**Figure S1: Schematic diagram illustrating mechanism of ITZ action as an anticancer drug created by Biorender.**

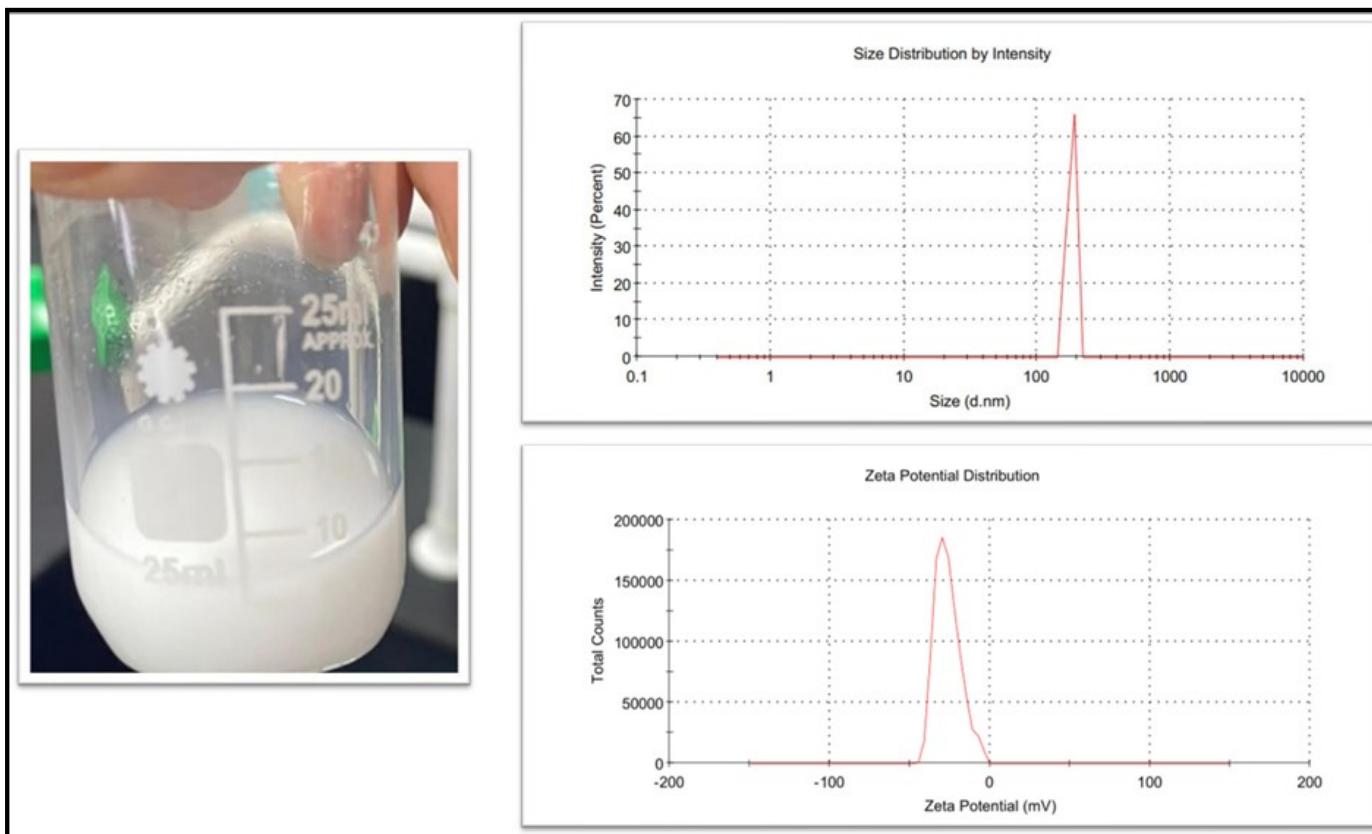

**Figure S2: Glucospanlastics containing ascorbyl glucoside “AA-2G” as a component and their PS, PDI and ZP ( $P_{CG2}$ ).**
